# Supplementary material for: Contributions of Titin and Collagen to Passive Stress in Muscles from mdm Mice with a Small Deletion in Titin’s Molecular Spring
Source: MDPI journal article supplement (doi:10.3390/ijms23168858), 2022-08-09
Supplement: s1 [file s1]

# Supplementary Material

**Table S1.** RNA-Seq read alignment summary for the wild-type samples used in the study.

|              |                                                  | EDL_R1   | EDL_R2   | EDL_R3   | Psoas_R1 | Psoas_R2 | Psoas_R3 | Soleus_R1 | Soleus_R2 | Soleus_R3 | Soleus_R4 |
|--------------|--------------------------------------------------|----------|----------|----------|----------|----------|----------|-----------|-----------|-----------|-----------|
|              | Age (days)                                       | 42       | 54       | 44       | 42       | 54       | 44       | 42        | 44        | 32        | 44        |
|              | RNA integrity number (RIN)                       | 8.4      | 8.4      | 8.5      | 7.3      | 8.1      | 8        | 8.2       | 8.1       | 7.6       | 8.1       |
|              | Library size                                     | 274      | 264      | 278      | 256      | 271      | 277      | 258       | 295       | 265       | 276       |
| Left reads:  | Initial number of reads                          | 87185432 | 57368915 | 15186094 | 1E+08    | 45937372 | 13847980 | 22022374  | 28236087  | 12437526  | 15940351  |
|              | Minimum per base quality score (10th percentile) | 14       | 14       | 27       | 14       | 14       | 32       | 32        | 32        | 32        | 32        |
|              | Percent filtered in (%)                          | 81.38    | 80.83    | N/A      | 81.86    | 80.26    | N/A      | N/A       | N/A       | N/A       | N/A       |
|              | Alignment input                                  | 70950705 | 46369117 | 15186094 | 81953371 | 36870545 | 13847980 | 22022374  | 28236087  | 12437526  | 15940351  |
|              | Mapped                                           | 55572350 | 44539661 | 14774183 | 62419592 | 28077507 | 13534841 | 17953627  | 27374091  | 12109861  | 15593067  |
|              | Multiple alignments                              | 18.5%    | 19.1%    | 9.4%     | 18.7%    | 15.9%    | 9.9%     | 15.2%     | 9.4%      | 12.9%     | 9.4%      |
|              | Percent mapped                                   | 78.3%    | 96.1%    | 97.3%    | 76.2%    | 76.2%    | 97.7%    | 81.5%     | 96.9%     | 97.4%     | 97.8%     |
|              |                                                  |          |          |          |          |          |          |           |           |           |           |
| Right reads: | Initial number of reads                          | 87185432 | 57368915 | 15186094 | 1E+08    | 45937372 | 13847980 | 22022374  | 28236087  | 12437526  | 15940351  |
|              | Minimum per base quality score (10th percentile) | 14       | 14       | 27       | 14       | 14       | 27       | 27        | 27        | 27        | 27        |
|              | Percent filtered in (%)                          | 81.38    | 80.83    | N/A      | 81.86    | 80.26    | N/A      | N/A       | N/A       | N/A       | N/A       |
|              | Alignment input                                  | 70950705 | 46369117 | 15186094 | 81953371 | 36870545 | 13847980 | 22022374  | 28236087  | 12437526  | 15940351  |
|              | Mapped                                           | 56026587 | 44570183 | 14597762 | 62738333 | 28269426 | 13259768 | 17647947  | 26044316  | 11953398  | 15344925  |
|              | Multiple alignments                              | 18.4%    | 19.2%    | 9.4%     | 18.7%    | 8.2%     | 9.9%     | 15.1%     | 9.3%      | 12.8%     | 9.4%      |
|              | Percent mapped                                   | 79.0%    | 96.1%    | 96.1%    | 76.2%    | 76.7%    | 95.8%    | 80.1%     | 92.2%     | 96.1%     | 96.3%     |

**Table S2.** Alignment statistics of *mdm* samples.

|                            |                                        | EDL_R1   | EDL_R2   | EDL_R3   | EDL_R4   | EDL_R5   | Psoas_R1 | Psoas_R2 | Psoas_R3 | Psoas_R4 | Psoas_R5 | Soleus_R1 | Soleus_R2 | Soleus_R3 |
|----------------------------|----------------------------------------|----------|----------|----------|----------|----------|----------|----------|----------|----------|----------|-----------|-----------|-----------|
| Age (days)                 |                                        | 38       | 38       | 42       | 38       | 38       | 29       | 38       | 42       | 38       | 38       | 33        | 36        | 38        |
| RNA integrity number (RIN) |                                        | 8.6      | 8        | 7.9      | 7.8      | 8.1      | 7.7      | 7.8      | 7.8      | 7        | 7.5      | 8.7       | 7.5       | 7.8       |
| Average Library size       |                                        | 262      | 323      | 265      | 262      | 262      | 258      | 287      | 277      | 262      | 262      | 290       | 279       | 262       |
| Left reads:                | Initial number of reads                | 53885039 | 34932333 | 15793758 | 19829205 | 15148894 | 42440352 | 26748973 | 18199625 | 17724225 | 21623821 | 41514793  | 23439543  | 11885279  |
|                            | Minimum average per base quality score | 32       | 32       | 32       | 32       | 32       | 30       | 32       | 32       | 32       | 32       | 32        | 32        | 32        |
|                            | Percent filtered in (%)                | NA       | NA       | 77%      | 88%      | NA       | 82%      | NA       | NA       | NA       | NA       | NA        | NA        | 87%       |
|                            | Alignment input                        | 53885039 | 34932333 | 12148686 | 17394262 | 15148894 | 34823448 | 26748973 | 18199625 | 17724225 | 21623821 | 41514793  | 23439543  | 10386271  |
|                            | Mapped                                 | 49508738 | 33952263 | 11887172 | 16686560 | 14436007 | 32915940 | 25658557 | 17475681 | 17003352 | 20516046 | 39386741  | 22523933  | 9583779   |
|                            | Multiple alignments                    | 16.60%   | 8.50%    | 9.50%    | 32       | 32       | 9.00%    | 7.80%    | 6.80%    | 32       | 32       | 9.70%     | 7.50%     | 30        |
|                            | Percent mapped                         | 91.90%   | 97.20%   | 97.80%   | 95.93%   | 95.29%   | 94.50%   | 95.90%   | 96.00%   | 95.93%   | 94.88%   | 94.90%    | 96.10%    | 92.27%    |
|                            |                                        |          |          |          |          |          |          |          |          |          |          |           |           |           |
| Right reads:               | Initial number of reads                | 53885039 | 34932333 | 15793758 | 19829205 | 15148894 | 42440352 | 26748973 | 18199625 | 17724225 | 21623821 | 41514793  | 23439543  | 11885279  |
|                            | Minimum average per base quality score | 32       | 32       | 32       | 32       | 30       | 30       | 27       | 27       | 30       | 30       | 27        | 27        | 32        |
|                            | Percent filtered in (%)                | NA       | NA       | 77%      | 88%      | NA       | 82%      | NA       | NA       | NA       | NA       | NA        | NA        | 87.39%    |
|                            | Alignment input                        | 53885039 | 34932333 | 12148686 | 17394262 | 15148894 | 34823448 | 26748973 | 18199625 | 17724225 | 21623821 | 41514793  | 23439543  | 10386271  |
|                            | Mapped                                 | 48848914 | 32872092 | 11658223 | 16644030 | 13857045 | 32889036 | 24621394 | 17269780 | 16465048 | 20072739 | 38831363  | 22091290  | 9557932   |
|                            | Multiple alignments                    | 16.60%   | 8.40%    | 9.40%    |          |          | 8.40%    | 7.80%    | 6.80%    |          |          | 9.70%     | 7.50%     |           |

|  |                |        |        |        |        |        |        |        |        |        |        |        |        |        |
|--|----------------|--------|--------|--------|--------|--------|--------|--------|--------|--------|--------|--------|--------|--------|
|  | Percent mapped | 91.70% | 94.10% | 96.00% | 95.69% | 91.47% | 94.40% | 92.00% | 94.90% | 92.90% | 92.83% | 93.50% | 94.20% | 92.00% |
|--|----------------|--------|--------|--------|--------|--------|--------|--------|--------|--------|--------|--------|--------|--------|
